# Supplementary material for: Cross-resistance is modular in bacteria–phage interactions
Source: PubMed Central journal article supplement (PMC6188897; doi:10.1371/journal.pbio.2006057), 2018-10-03
Supplement: pbio.2006057.s013.pdf [file pbio.2006057.s013.pdf]

| Function                        | Gene mutated                                | Operon/Cluster                                                                                       | Gene product activity                                                                                                                               | Chromosome position (bp)  | Effect type                | Putative impact | Clone     | Focal phage resistance | Cross-resistance provided |
|---------------------------------|---------------------------------------------|------------------------------------------------------------------------------------------------------|-----------------------------------------------------------------------------------------------------------------------------------------------------|---------------------------|----------------------------|-----------------|-----------|------------------------|---------------------------|
| Lipopolysaccharide biosynthesis | wbpL                                        | wbp cluster                                                                                          | Glycosyl transferase required for LPS A- and B-band biosynthesis                                                                                    | 3529218                   | frameshift (1bp insertion) | HIGH            | SM13.1_5  | PA13P1                 | within module 2           |
|                                 | wzy                                         | wbp cluster                                                                                          | LPS B-band O-antigen polymerase                                                                                                                     | 3538988                   | frameshift (1bp insertion) | HIGH            | SM10.2_1  | PA10P2                 | within module 2           |
|                                 |                                             |                                                                                                      |                                                                                                                                                     | 3538988                   | frameshift (1bp insertion) | HIGH            | SM14/1_3  | 14/1                   | within module 2           |
|                                 |                                             |                                                                                                      |                                                                                                                                                     | 3538988                   | frameshift (1bp insertion) | HIGH            | SM2.1_3   | PA2P1                  | within module 2           |
|                                 |                                             |                                                                                                      |                                                                                                                                                     | 3538988                   | frameshift (1bp insertion) | HIGH            | SM5.1_8   | PA5P1                  | within module 2           |
| 3538988                         | frameshift (1bp insertion)                  | HIGH                                                                                                 | SM7.2_6                                                                                                                                             | PAP7P2                    | within module 2            |                 |           |                        |                           |
| Type IV pilus motility          | pilB                                        |                                                                                                      | Motor protein powering pilus extension                                                                                                              | 5071434                   | stop gained                | HIGH            | SMPNM_2   | PNM                    | within module 1           |
|                                 |                                             |                                                                                                      |                                                                                                                                                     | 5070526                   | frameshift (4bp deletion)  | HIGH            | SMPNM_3   | PNM                    | within module 1           |
|                                 | pilT                                        |                                                                                                      | Motor protein powering pilus retraction                                                                                                             | 437147                    | missense variant           | MODERATE        | SM5.2_2   | PA5P2                  | within module 1           |
|                                 |                                             |                                                                                                      |                                                                                                                                                     | 437058-438250             | deletion (1,192bp)         | HIGH            | SM5.2_7   | PA5P2                  | within module 1           |
|                                 | 437130                                      | disruptive inframe deletion (12bp)                                                                   | MODERATE                                                                                                                                            | SMPT7_1                   | PT7                        | within module 1 |           |                        |                           |
| pilY1                           | fimU-pilV-pilW-pilX-pilY1-pilY2-pilE operon | Putative anti-retraction factor                                                                      | 5101300                                                                                                                                             | frameshift (1bp deletion) | HIGH                       | SMPNM_9         | PNM       | within module 1        |                           |
| pilJ                            | pilJ-pilK-chpA-chpB-chpC-chpD operon        | Transduction of chemotaxis-related signals to two-component system regulating type IV pilus motility | 453128                                                                                                                                              | missense variant          | MODERATE                   | SMPT7_5         | PT7       | within module 1        |                           |
| Type IV pilus biosynthesis      | pilD                                        | pilC-pilD-coaE-PA4530 operon                                                                         | N-methyltransferase involved in processing prepilins                                                                                                | 5073276                   | stop gained                | HIGH            | SM5.2_9   | PA5P2                  | between modules           |
|                                 | pilQ                                        | pilM-pilN-pilO-pilP-pilQ operon                                                                      | Outer membrane secretin pore within pilus structure                                                                                                 | 5676479-5676662           | deletion (183bp)           | HIGH            | SM5.2_6   | PA5P2                  | within module 1           |
|                                 | fimV                                        | fimV-truA-trpF operon                                                                                | Peptidoglycan binding protein involved in pilus assembly                                                                                            | 3497951-3497986           | frameshift (35bp deletion) | HIGH            | SMPNM_6   | PNM                    | within module 1           |
| Signaling and global regulation | rpoN                                        | rpoN-PA4463-ptsN-PA4465-PA4466 operon                                                                | Alternative RNA polymerase sigma-54 factor (global gene regulation); regulates expression of pilA, which encodes the major pilin structural protein | 4993096                   | frameshift (1bp deletion)  | HIGH            | SMPNM_8   | PNM                    | between modules           |
|                                 |                                             |                                                                                                      |                                                                                                                                                     | 4994077                   | missensevariant            | MODERATE        | SMPT7_7   | PT7                    | between modules           |
|                                 | pilR                                        | pilS-pilR operon                                                                                     | Two component system: Pils (sensor) and PilR (regulator) regulate production of the major pilin protein, PilA, through RpoN                         | 5096180                   | frameshift(1bpdeletion)    | HIGH            | SM5.2_3   | PA5P2                  | within module 1           |
|                                 |                                             |                                                                                                      |                                                                                                                                                     | 5096282                   | missensevariant            | MODERATE        | SMphiKZ_5 | Φ KZ                   | within module 1           |
| pilS                            |                                             |                                                                                                      | 5094532                                                                                                                                             | stopgained                | HIGH                       | SMPT7_9         | PT7       | between modules        |                           |
| Other                           | PA1875                                      | PA1874-PA1875-PA1876-PA1877 operon                                                                   | Putative efflux pump                                                                                                                                | 2045090                   | missensevariant            | MODERATE        | SMPT7_5   | PT7                    | within module 1           |
