# Supplementary material for: Cross-resistance is modular in bacteria–phage interactions
Source: PubMed Central journal article supplement (PMC6188897; doi:10.1371/journal.pbio.2006057), 2018-10-03
Supplement: pbio.2006057.s014.pdf [file pbio.2006057.s014.pdf]

| Strain | Source                            | Date first isolated | Isolation Host                | Morphotype  | Genome size (kb) | Accession number |
|--------|-----------------------------------|---------------------|-------------------------------|-------------|------------------|------------------|
| ΦKZ    | Sewage water, Kazakhstan          | 1975                |                               | Myoviridae  | 280.33           | NC_004629.1      |
| PNM    | Mtkvari River, Tbilisi, Georgia   | 1999                |                               | Podoviridae | 42.72            | -                |
| PT7    | Lake Ku, Tbilisi, Georgia         | 1999                |                               | Myoviridae  | 58.2             | -                |
| 14/1   | Sewage water, Regensburg, Germany | 2000                |                               | Myoviridae  | 66.23            | NC_011703.1      |
| PA1P1  | Sewage water, Jyväskylä, Finland  | 2015                | <i>Pseudomonas aeruginosa</i> | -           | -                | -                |
| PA1P2  |                                   |                     | 61841                         | -           | -                | -                |
| PA1P3  |                                   |                     | <i>Pseudomonas aeruginosa</i> | -           | 66.46            | -                |
| PA1P4  |                                   |                     | 61841                         | -           | -                | -                |
| PA1P5  |                                   |                     | <i>Pseudomonas aeruginosa</i> | -           | -                | -                |
| PA2P1  |                                   |                     | 61841                         | -           | -                | -                |
| PA4P2  |                                   |                     | <i>Pseudomonas aeruginosa</i> | -           | -                | -                |
| PA5P1  |                                   |                     | 61823                         | -           | -                | -                |
| PA5P2  |                                   |                     | <i>Pseudomonas aeruginosa</i> | -           | -                | -                |
| PA7P1  |                                   |                     | 11AN03663                     | -           | -                | -                |
| PA7P2  |                                   |                     | <i>Pseudomonas aeruginosa</i> | -           | -                | -                |
| PA8P1  |                                   |                     | 62314                         | -           | -                | -                |
| PA8P2  |                                   |                     | <i>Pseudomonas aeruginosa</i> | -           | -                | -                |
| PA10P1 |                                   |                     | 62263                         | -           | -                | -                |
| PA10P2 | <i>Pseudomonas aeruginosa</i>     | -                   | -                             | -           |                  |                  |
| PA10P3 | 62206                             | -                   | -                             | -           |                  |                  |
| PA11P1 | <i>Pseudomonas aeruginosa</i>     | -                   | 66.06                         | -           |                  |                  |
| PA11P2 | 62180                             | -                   | -                             | -           |                  |                  |
| PA12P1 | <i>Pseudomonas aeruginosa</i>     | -                   | -                             | -           |                  |                  |
| PA12P2 | 62181                             | -                   | -                             | -           |                  |                  |
| PA13P1 | <i>Pseudomonas aeruginosa</i>     | -                   | -                             | -           |                  |                  |
| PA13P2 | 62172                             | -                   | -                             | -           |                  |                  |
| PA14P2 | <i>Pseudomonas aeruginosa</i>     | -                   | -                             | -           |                  |                  |
|        |                                   |                     | 62109                         |             |                  |                  |
