# Supplementary material for: Cross-resistance is modular in bacteria–phage interactions
Source: PubMed Central journal article supplement (PMC6188897; doi:10.1371/journal.pbio.2006057), 2018-10-03
Supplement: pbio.2006057.s015.pdf [file pbio.2006057.s015.pdf]

| Name                                     | Sequence       | Reference                            |
|------------------------------------------|----------------|--------------------------------------|
| RAPD <sup>i</sup> /Primer5 <sup>ii</sup> | 5'AACGCGCAAC3' | <sup>i</sup> :[1] <sup>ii</sup> :[2] |
| P1                                       | 5'CCGCAGCCAA3' | [1]                                  |
| P2                                       | 5'AACGGGCAGA3' | [1]                                  |
| OPL5                                     | 5'ACGCAGGCAC3' | [1]                                  |
| Primer1                                  | 5'GGTGCGGGAA3' | [2]                                  |
| Primer2                                  | 5'GTTTCGCTCC3' | [2]                                  |
| Primer3                                  | 5'GTAGACCCGT3' | [2]                                  |
| Primer4                                  | 5'AAGAGCCCGT3' | [2]                                  |
| Primer6                                  | 5'CCCGTCAGCA3' | [2]                                  |

1. AzizianR,NasserA,AskariH,TaheriKalaniM,SadeghifardN,PakzadI,etal.Sewageasa richsourceofphagestudyagainstPseudomonasaeruginosaPAO.Biologicals.2015;43: 238–241.doi:10.1016/j.biologicals.2015.05.004
2. KumariS,HarjaiK,ChhibberS.Isolationandcharacterizationof *Klebsiellapneumoniae* specificbacteriophagesfromsewagesamples.FoliaMicrobiol(Praha).2010;55:221 – 227.doi:10.1007/s12223 -010-0032-7
